# Supplementary material
Source: Springer Nature journal article supplement (https://www.springermedizin.de/resource/supplementary/13075_2012_3976_MOESM1_ESM.pdf/10110284)

**A**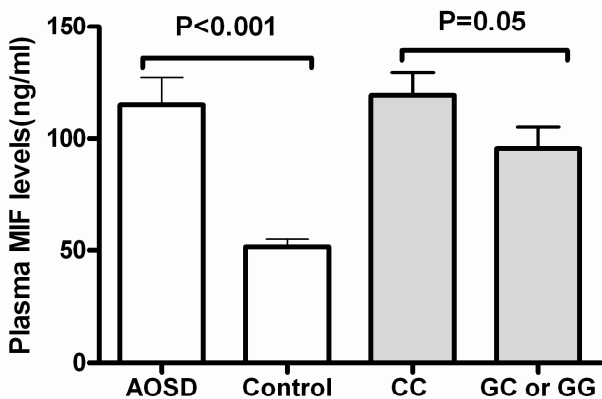**B**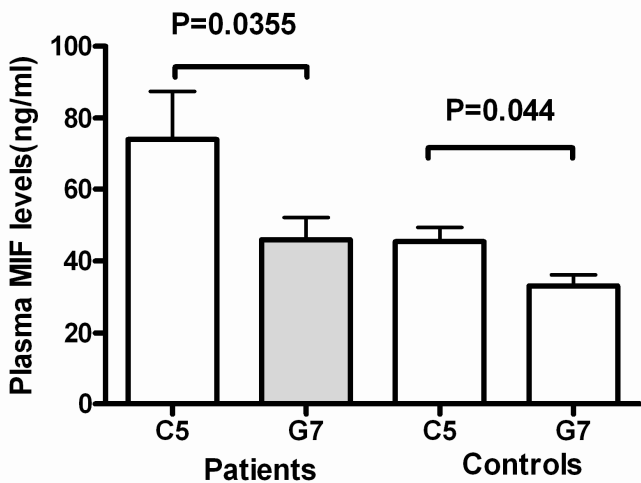

Supplement: MOESM1 [file 10110284]
